# Supplementary material for: Genomic Surveillance of Rabies Virus in Georgian Canines
Source: Preprints.org preprint supplement (doi:10.20944/preprints202306.1828.v1), 2023-06-26
Supplement: Supplementary file 2 [file supplementary]

Supplementary Table 1

| Sample name | Host Species | RT-PCR RABV | RABV sequencing reads | Depth of Coverage | Breadth of Coverage | GenBank Sequence ID | Clade        | Ectodomain Group | Location of sample collection | Date of sample collection |
|-------------|--------------|-------------|-----------------------|-------------------|---------------------|---------------------|--------------|------------------|-------------------------------|---------------------------|
| RABV-GEO-1  | Dog          | +           | 0.13%                 | 703               | CC                  | OQ603614            | Cosmopolitan | ECTO1            | Kakheti                       | 1/15/2018                 |
| RABV-GEO-2  | Dog          | +           | 0.20%                 | 2,000             | CC                  | OQ603624            | Cosmopolitan | ECTO2            | Kvemo Kartli                  | 1/23/2018                 |
| RABV-GEO-3  | Dog          | +           | 0.15%                 | 1,207             | CC                  | OQ603632            | Cosmopolitan | ECTO1            | Kakheti                       | 1/29/2018                 |
| RABV-GEO-4  | Dog          | +           | 0.10%                 | 673               | CC                  | OQ603643            | Cosmopolitan | ECTO1            | Samegrelo                     | 2/6/2018                  |
| RABV-GEO-5  | Dog          | +           | 0.16%                 | 1,426             | CC                  | OQ603657            | Cosmopolitan | ECTO1            | Kakheti                       | 2/12/2018                 |
| RABV-GEO-6  | Dog          | +           | 0.19%                 | 57                | CC                  | OQ603609            | Cosmopolitan | ECTO1            | Kakheti                       | 3/19/2018                 |
| RABV-GEO-7  | Dog          | +           | 0.04%                 | 80                | CC                  | OQ603668            | Cosmopolitan | ECTO1            | Samegrelo                     | 4/18/2018                 |
| RABV-GEO-8  | Dog          | +           | 0.14%                 | 930               | CC                  | OQ603679            | Cosmopolitan | ECTO1            | Kakheti                       | 4/26/2018                 |
| RABV-GEO-9  | Dog          | +           | 0.23%                 | 164               | CC                  | OQ603612            | Cosmopolitan | ECTO1            | Kakheti                       | 4/27/2018                 |
| RABV-GEO-10 | Dog          | +           | 0.14%                 | 2,878             | CC                  | OQ603615            | Cosmopolitan | ECTO1            | Samegrelo                     | 5/10/2018                 |
| RABV-GEO-11 | Dog          | +           | 0.17%                 | 1,056             | CC                  | OQ603616            | Cosmopolitan | ECTO1            | Tbilisi                       | 5/14/2018                 |
| RABV-GEO-12 | Dog          | +           | 0.13%                 | 783               | CC                  | OQ603617            | Cosmopolitan | ECTO3            | Kvemo Kartli                  | 5/16/2018                 |
| RABV-GEO-13 | Dog          | +           | 0.03%                 | 20,480            | CC                  | OQ603610            | Cosmopolitan | ECTO1            | Kakheti                       | 6/4/2018                  |
| RABV-GEO-14 | Dog          | +           | 0.26%                 | 1,864             | CC                  | OQ603618            | Cosmopolitan | ECTO1            | Kakheti                       | 7/2/2018                  |
| RABV-GEO-15 | Dog          | +           | 0.10%                 | 431               | CC                  | OQ603619            | Cosmopolitan | ECTO1            | Kakheti                       | 7/5/2018                  |
| RABV-GEO-16 | Dog          | +           | 0.93%                 | 12,251            | CC                  | OQ603620            | Cosmopolitan | ECTO1            | Tbilisi                       | 8/7/2018                  |
| RABV-GEO-17 | Dog          | +           | 0.63%                 | 11,796            | CC                  | OQ603621            | Cosmopolitan | ECTO1            | Tbilisi                       | 8/9/2018                  |
| RABV-GEO-18 | Dog          | +           | 0.39%                 | 2,869             | CC                  | OQ603622            | Cosmopolitan | ECTO1            | Samegrelo                     | 8/20/2018                 |
| RABV-GEO-19 | Dog          | +           | 0.16%                 | 945               | NCC                 | OQ603623            | Cosmopolitan | ECTO4            | Samegrelo                     | 9/27/2018                 |
| RABV-GEO-20 | Dog          | +           | 0.40%                 | 852               | CC                  | OQ603611            | Cosmopolitan | ECTO12           | Samegrelo                     | 10/23/2018                |
| RABV-GEO-21 | Dog          | +           | 0.15%                 | 877               | CC                  | OQ603625            | Cosmopolitan | ECTO1            | Kvemo Kartli                  | 01/14/2020                |
| RABV-GEO-23 | Dog          | +           | 0.04%                 | 58                | CC                  | OQ603626            | Cosmopolitan | ECTO1            | Samegrelo                     | 01/22/2019                |
| RABV-GEO-25 | Dog          | +           | 0.19%                 | 1,650             | CC                  | OQ603627            | Cosmopolitan | ECTO1            | Kakheti                       | 01/28/2019                |
| RABV-GEO-26 | Dog          | +           | 0.11%                 | 1,238             | CC                  | OQ603628            | Cosmopolitan | ECTO1            | Kakheti                       | 02/13/2020                |
| RABV-GEO-27 | Dog          | +           | 0.12%                 | 723               | CC                  | OQ603629            | Cosmopolitan | ECTO5            | Kvemo Kartli                  | 02/18/2019                |
| RABV-GEO-28 | Dog          | +           | 0.12%                 | 1,879             | CC                  | OQ603630            | Cosmopolitan | ECTO1            | Kakheti                       | 02/21/2020                |
| RABV-GEO-29 | Dog          | +           | 0.17%                 | 827               | CC                  | OQ603631            | Cosmopolitan | ECTO1            | Kakheti                       | 03/04/2019                |
| RABV-GEO-30 | Dog          | +           | 0.08%                 | 297               | CC                  | OQ603633            | Cosmopolitan | ECTO1            | Samegrelo                     | 02/28/2020                |
| RABV-GEO-31 | Dog          | +           | 0.13%                 | 837               | CC                  | OQ603634            | Cosmopolitan | ECTO2            | Kvemo Kartli                  | 04/02/2019                |
| RABV-GEO-32 | Dog          | +           | 0.19%                 | 1,933             | CC                  | OQ603635            | Cosmopolitan | ECTO1            | Kakheti                       | 04/11/2019                |
| RABV-GEO-33 | Dog          | +           | 0.06%                 | 218               | CC                  | OQ603636            | Cosmopolitan | ECTO1            | Samegrelo                     | 04/15/2019                |
| RABV-GEO-34 | Dog          | +           | 0.09%                 | 731               | CC                  | OQ603637            | Cosmopolitan | ECTO1            | Kvemo Kartli                  | 04/22/2019                |
| RABV-GEO-35 | Dog          | +           | 0.16%                 | 2,310             | CC                  | OQ603638            | Cosmopolitan | ECTO1            | Samegrelo                     | 04/24/2019                |
| RABV-GEO-36 | Dog          | +           | 0.05%                 | 375               | CC                  | OQ603639            | Cosmopolitan | ECTO1            | Samegrelo                     | 05/15/2019                |
| RABV-GEO-37 | Dog          | +           | 0.09%                 | 2,061             | CC                  | OQ603640            | Cosmopolitan | ECTO6            | Tbilisi                       | 05/20/2019                |
| RABV-GEO-38 | Dog          | +           | 0.17%                 | 3,427             | CC                  | OQ603641            | Cosmopolitan | ECTO2            | Samegrelo                     | 05/23/2019                |
| RABV-GEO-39 | Dog          | +           | 0.21%                 | 4,533             | CC                  | OQ603642            | Cosmopolitan | ECTO2            | Kvemo Kartli                  | 05/30/2019                |
| RABV-GEO-40 | Dog          | +           | 0.05%                 | 210               | CC                  | OQ603644            | Cosmopolitan | ECTO1            | Samegrelo                     | 06/03/2019                |
| RABV-GEO-41 | Dog          | +           | 0.09%                 | 856               | CC                  | OQ603645            | Cosmopolitan | ECTO1            | Samegrelo                     | 06/26/2019                |
| RABV-GEO-42 | Dog          | +           | 0.04%                 | 188               | CC                  | OQ603646            | Cosmopolitan | ECTO1            | Samegrelo                     | 06/26/2019                |
| RABV-GEO-43 | Dog          | +           | 0.07%                 | 441               | CC                  | OQ603647            | Cosmopolitan | ECTO7            | Tbilisi                       | 06/28/2019                |

|              |        |   |       |       |     |          |              |        |              |            |
|--------------|--------|---|-------|-------|-----|----------|--------------|--------|--------------|------------|
| RABV-GEO-44  | Dog    | + | 0.09% | 717   | CC  | OQ603648 | Cosmopolitan | ECTO1  | Kakheti      | 07/01/2019 |
| RABV-GEO-45  | Dog    | + | 0.09% | 801   | CC  | OQ603649 | Cosmopolitan | ECTO1  | Samegrelo    | 07/05/2019 |
| RABV-GEO-49  | Dog    | + | 0.19% | 3,886 | CC  | OQ603650 | Cosmopolitan | ECTO1  | Kvemo Kartli | 08/30/2019 |
| RABV-GEO-50  | Dog    | + | 0.15% | 2,040 | CC  | OQ603651 | Cosmopolitan | ECTO1  | Kakheti      | 09/25/2019 |
| RABV-GEO-54  | Dog    | + | 0.05% | 459   | CC  | OQ603652 | Cosmopolitan | ECTO6  | Kvemo Kartli | 12/25/2019 |
| RABV-GEO-55  | Dog    | + | 0.07% | 1,448 | CC  | OQ603653 | Cosmopolitan | ECTO1  | Kakheti      | 12/26/2019 |
| RABV-GEO-57  | Dog    | + | 0.09% | 3,303 | CC  | OQ603654 | Cosmopolitan | ECTO1  | Kvemo Kartli | 12/30/2019 |
| RABV-GEO-58  | Dog    | + | 0.11% | 2,247 | CC  | OQ603655 | Cosmopolitan | ECTO1  | Kakheti      | 11/21/2018 |
| RABV-GEO-59  | Dog    | + | 0.16% | 1,695 | CC  | OQ603656 | Cosmopolitan | ECTO1  | Kakheti      | 11/27/2018 |
| RABV-GEO-60  | Dog    | + | 0.16% | 4,158 | CC  | OQ603658 | Cosmopolitan | ECTO1  | Kakheti      | 12/20/2018 |
| RABV-GEO-61  | Jackal | + | 0.05% | 244   | CC  | OQ603659 | Cosmopolitan | ECTO1  | Samegrelo    | 1/13/2020  |
| RABV-GEO-62  | Dog    | + | 0.13% | 1,536 | CC  | OQ603660 | Cosmopolitan | ECTO1  | Kvemo Kartli | 2/1/2021   |
| RABV-GEO-63  | Jackal | + | 0.28% | 5,656 | CC  | OQ603661 | Cosmopolitan | ECTO1  | Kvemo Kartli | 2/1/2021   |
| RABV-GEO-64  | Dog    | + | 0.15% | 720   | CC  | OQ603662 | Cosmopolitan | ECTO1  | Kvemo Kartli | 2/3/2021   |
| RABV-GEO-65  | Dog    | + | 0.21% | 1,167 | CC  | OQ603663 | Cosmopolitan | ECTO1  | Adjara       | 2/5/2021   |
| RABV-GEO-66  | Jackal | + | 0.09% | 289   | CC  | OQ603664 | Cosmopolitan | ECTO8  | Adjara       | 2/8/2021   |
| RABV-GEO-67  | Jackal | + | 0.06% | 17    | CC  | OQ603665 | Cosmopolitan | ECTO8  | Kakheti      | 2/15/2018  |
| RABV-GEO-68  | Dog    | + | 0.18% | 1,159 | CC  | OQ603666 | Cosmopolitan | ECTO1  | Kakheti      | 3/1/2021   |
| RABV-GEO-69  | Dog    | + | 0.23% | 943   | CC  | OQ603667 | Cosmopolitan | ECTO1  | Kvemo Kartli | 2/28/2020  |
| RABV-GEO-70  | Dog    | + | 0.15% | 399   | CC  | OQ603669 | Cosmopolitan | ECTO1  | Tbilisi      | 3/6/2020   |
| RABV-GEO-71  | Dog    | + | 0.44% | 2,507 | CC  | OQ603670 | Cosmopolitan | ECTO1  | Kakheti      | 3/20/2020  |
| RABV-GEO-72  | Dog    | + | 0.54% | 1,534 | CC  | OQ603671 | Cosmopolitan | ECTO2  | Kvemo Kartli | 3/19/2020  |
| RABV-GEO-73  | Dog    | + | 0.25% | 926   | CC  | OQ603672 | Cosmopolitan | ECTO9  | Kakheti      | 4/5/2021   |
| RABV-GEO-74  | Dog    | + | 0.12% | 302   | CC  | OQ603673 | Cosmopolitan | ECTO1  | Samegrelo    | 3/24/2020  |
| RABV-GEO-75  | Dog    | + | 0.15% | 532   | CC  | OQ603674 | Cosmopolitan | ECTO10 | Kvemo Kartli | 3/26/2020  |
| RABV-GEO-76  | Dog    | + | 0.20% | 1,182 | CC  | OQ603675 | Cosmopolitan | ECTO1  | Kvemo Kartli | 4/7/2021   |
| RABV-GEO-77  | Dog    | + | 0.09% | 270   | CC  | OQ603676 | Cosmopolitan | ECTO11 | Kvemo Kartli | 4/8/2021   |
| RABV-GEO-78  | Dog    | + | 0.07% | 138   | CC  | OQ603677 | Cosmopolitan | ECTO1  | Kvemo Kartli | 4/7/2020   |
| RABV-GEO-79  | Dog    | + | 0.14% | 360   | CC  | OQ603678 | Cosmopolitan | ECTO1  | Kvemo Kartli | 4/8/2020   |
| RABV-GEO-80  | Jackal | + | 0.35% | 2,440 | CC  | OQ603680 | Cosmopolitan | ECTO1  | Kakheti      | 4/27/2020  |
| RABV-GEO-83  | Jackal | + | 0.11% | 39    | CC  | OQ603681 | Cosmopolitan | ECTO1  | Kvemo Kartli | 6/8/2020   |
| RABV-GEO-88  | Jackal | - | 0.17% | 207   | CC  | OQ603682 | Cosmopolitan | ECTO1  | Kakheti      | 7/6/2021   |
| RABV-GEO-91  | Dog    | + | 0.10% | 77    | CC  | OQ603683 | Cosmopolitan | ECTO1  | Kvemo Kartli | 8/31/2020  |
| RABV-GEO-95  | Jackal | + | 0.07% | 6     | NCC | OQ603684 | Cosmopolitan | N/A    | Kvemo Kartli | 9/4/2019   |
| RABV-GEO-96  | Dog    | + | 0.06% | 13    | NCC | OQ603685 | Cosmopolitan | ECTO1  | Tbilisi      | 10/19/2020 |
| RABV-GEO-97  | Jackal | - | 0.14% | 46    | CC  | OQ603613 | Cosmopolitan | ECTO4  | Imereti      | 11/2/2021  |
| RABV-GEO-100 | Jackal | - | 0.12% | 3     | N/A | N/A      | ND           | N/A    | Kakheti      | 11/23/2018 |

Supplementary Table 2

| Sample  | Reference Position | Type | Length | Reference | Allele | Zygosity     | Count | Coverage | Frequency | Forward/reverse balance | Average quality |
|---------|--------------------|------|--------|-----------|--------|--------------|-------|----------|-----------|-------------------------|-----------------|
| RABV_19 | 86                 | SNV  | 1      | A         | G      | Heterozygous | 1562  | 3014     | 51.82     | 0.314                   | 36.54545        |
| RABV_19 | 92                 | SNV  | 1      | C         | A      | Heterozygous | 1666  | 3197     | 52.11     | 0.318                   | 36.60744        |
| RABV_19 | 330                | SNV  | 1      | N         | C      | Heterozygous | 1713  | 4301     | 39.83     | 0.49                    | 36.60304        |
| RABV_19 | 330                | SNV  | 1      | N         | T      | Heterozygous | 2574  | 4301     | 59.85     | 0.48                    | 36.68298        |
| RABV_19 | 641                | SNV  | 1      | T         | C      | Heterozygous | 1068  | 3040     | 35.13     | 0.464                   | 36.25655        |
| RABV_19 | 836                | SNV  | 1      | A         | G      | Heterozygous | 2319  | 3700     | 62.68     | 0.484                   | 35.40535        |
| RABV_19 | 914                | SNV  | 1      | C         | T      | Heterozygous | 1472  | 3401     | 43.28     | 0.493                   | 36.78261        |
| RABV_19 | 1106               | SNV  | 1      | A         | G      | Heterozygous | 1410  | 3700     | 38.11     | 0.428                   | 36.52766        |
| RABV_19 | 1148               | SNV  | 1      | A         | G      | Heterozygous | 1464  | 3407     | 42.97     | 0.448                   | 36.43579        |
| RABV_19 | 1343               | SNV  | 1      | A         | G      | Heterozygous | 1357  | 3072     | 44.17     | 0.352                   | 36.53132        |
| RABV_19 | 1397               | SNV  | 1      | A         | G      | Heterozygous | 1237  | 2337     | 52.93     | 0.446                   | 36.19968        |
| RABV_19 | 1690               | SNV  | 1      | A         | G      | Heterozygous | 953   | 2423     | 39.33     | 0.454                   | 36.52361        |
| RABV_19 | 1916               | SNV  | 1      | A         | G      | Heterozygous | 1011  | 2081     | 48.58     | 0.495                   | 36.28981        |
| RABV_19 | 2147               | SNV  | 1      | N         | C      | Heterozygous | 604   | 1166     | 51.8      | 0.474                   | 36.11258        |
| RABV_19 | 2147               | SNV  | 1      | N         | T      | Heterozygous | 521   | 1166     | 44.68     | 0.441                   | 36.42418        |
| RABV_19 | 2267               | SNV  | 1      | A         | G      | Heterozygous | 1755  | 3161     | 55.52     | 0.405                   | 36.5396         |
| RABV_19 | 2288               | SNV  | 1      | T         | C      | Heterozygous | 2077  | 3543     | 58.62     | 0.387                   | 36.66009        |
| RABV_19 | 2386               | SNV  | 1      | T         | C      | Heterozygous | 678   | 1933     | 35.08     | 0.302                   | 35.73451        |
| RABV_19 | 2799               | SNV  | 1      | A         | C      | Heterozygous | 1348  | 2528     | 53.32     | 0.452                   | 36.47033        |
| RABV_19 | 3097               | SNV  | 1      | C         | G      | Heterozygous | 972   | 1953     | 49.77     | 0.325                   | 36.31687        |
| RABV_19 | 5307               | SNV  | 1      | C         | T      | Heterozygous | 912   | 1732     | 52.66     | 0.409                   | 36.48684        |
| RABV_19 | 7170               | SNV  | 1      | N         | A      | Heterozygous | 648   | 1256     | 51.59     | 0.478                   | 36.47531        |
| RABV_19 | 7170               | SNV  | 1      | N         | G      | Heterozygous | 590   | 1256     | 46.97     | 0.459                   | 35.89153        |
| RABV_19 | 9093               | SNV  | 1      | T         | G      | Heterozygous | 1273  | 2922     | 43.57     | 0.5                     | 35.95994        |
| RABV_19 | 9429               | SNV  | 1      | T         | G      | Heterozygous | 1374  | 2401     | 57.23     | 0.486                   | 36.70306        |
| RABV_19 | 10707              | SNV  | 1      | A         | G      | Heterozygous | 1074  | 2648     | 40.56     | 0.443                   | 36.63687        |
| RABV_19 | 11893              | SNV  | 1      | A         | T      | Heterozygous | 12    | 28       | 42.86     | 0.5                     | 37              |
| RABV_19 | 1411               | SNV  | 1      | A         | G      | Homozygous   | 1202  | 2144     | 56.06     | 0.433                   | 36.68552        |
| RABV_19 | 1514               | SNV  | 1      | A         | G      | Homozygous   | 1001  | 1745     | 57.36     | 0.45                    | 36.46853        |
| RABV_19 | 3430               | SNV  | 1      | C         | T      | Homozygous   | 2172  | 2883     | 75.34     | 0.458                   | 36.4116         |
| RABV_19 | 3457               | SNV  | 1      | A         | C      | Homozygous   | 2457  | 3173     | 77.43     | 0.437                   | 36.3195         |
| RABV_19 | 3572               | SNV  | 1      | A         | G      | Homozygous   | 1888  | 2622     | 72.01     | 0.438                   | 36.30085        |
| RABV_19 | 3646               | SNV  | 1      | T         | C      | Homozygous   | 1585  | 2343     | 67.65     | 0.415                   | 36.53438        |
| RABV_19 | 3700               | SNV  | 1      | A         | G      | Homozygous   | 1807  | 2618     | 69.02     | 0.49                    | 36.16989        |
| RABV_19 | 3730               | SNV  | 1      | T         | C      | Homozygous   | 2137  | 3005     | 71.11     | 0.464                   | 36.22789        |
| RABV_19 | 3817               | SNV  | 1      | C         | T      | Homozygous   | 1766  | 2505     | 70.5      | 0.465                   | 36.67497        |
| RABV_19 | 5150               | SNV  | 1      | C         | T      | Homozygous   | 2507  | 3833     | 65.41     | 0.487                   | 36.68967        |

Supplementary Table 3

| Country                | Sample collection year | Host Species  | Clade               | N gene (Genbank ID)                             | G gene (Genbank ID)                                              | Subregion (if Georgia) |
|------------------------|------------------------|---------------|---------------------|-------------------------------------------------|------------------------------------------------------------------|------------------------|
| Afghanistan            | 2004                   | Dog           | Arctic-related      | NA                                              | EU086128                                                         |                        |
| Afghanistan            | 1996                   | Dog           | Arctic-related      | EU086162                                        | NA                                                               |                        |
| Azerbaijan             | 2002                   | Dog           | Cosmopolitan        | LN879480                                        | LN879480                                                         |                        |
| Bosnia and Herzegovina | 1986                   | Wolf          | Cosmopolitan        | U42704                                          | NA                                                               |                        |
| Bosnia and Herzegovina | 1986                   | Red fox       | Cosmopolitan        | U42706                                          | NA                                                               |                        |
| Cambodia               | 1998;<br>1999          | Dog           | Asian               | EU086167;<br>EU086168;<br>EU086169;<br>EU086171 | EU086130;<br>EU086168;<br>EU<br>086131;<br>EU086132;<br>EU086133 |                        |
| China                  | 1998                   | Dog           | Asian               | EU086173                                        | EU086135                                                         |                        |
| China                  | 1992                   | Human         | Asian               | EU086176                                        | EU086139                                                         |                        |
| China                  | 2005                   | Dog           | Asian               | EU086186                                        | EU086146                                                         |                        |
| China                  | 2013                   | Fallow deer   | Asian               | KJ564280                                        | KJ564280                                                         |                        |
| China                  | 1994                   | Dog           | Asian               | KX148264                                        | KX148264                                                         |                        |
| Cote d'Ivoire          | 1992                   | Dog           | Africa-2            | KX148232                                        | KX148232                                                         |                        |
| Gabon                  | 1986                   | Dog           | ND                  | NA                                              | AF325470                                                         |                        |
| Georgia                | 2015                   | Dog           | Cosmopolitan        | MT079901;<br>MT079924;<br>MT079919              | NA                                                               | Adjara                 |
| Georgia                | 2015                   | Dog           | Cosmopolitan        | MT079892;<br>MT079903                           | NA                                                               | Guria                  |
| Georgia                | 2015                   | Dog           | Cosmopolitan        | MT079904;<br>MT079891;<br>MT079895              | NA                                                               | Imereti                |
| Georgia                | 2015                   | Dog           | Cosmopolitan        | MT079896;<br>MT079928;<br>MT079909              | NA                                                               | Kakheti                |
| Georgia                | 2015                   | Dog           | Cosmopolitan        | MT079889;<br>MT079897;<br>MT079927              | NA                                                               | Kvemo Kartli           |
| Georgia                | 2016                   | Golden jackal | Cosmopolitan        | MW055109                                        | NA                                                               | no data                |
| Georgia                | 2015;<br>2016          | Dog           | Cosmopolitan        | MT079906;<br>MT079926;<br>MT079900              | NA                                                               | Samegrelo-Zemo Svaneti |
| Georgia                | 2015                   | Dog           | Cosmopolitan        | MT079910;<br>MT079912;<br>MT079913              | NA                                                               | Shida Kartli           |
| Georgia                | 2015                   | Jackal        | Cosmopolitan        | MT079888                                        | NA                                                               | Tbilisi                |
| Georgia                | 2015                   | Dog           | Cosmopolitan        | MT079893;<br>MT079894;<br>MT079905              | NA                                                               | Tbilisi                |
| Greenland              | 1980                   | Dog           | Arctic-related      | KX148105                                        | KX148105                                                         |                        |
| Guinea                 | 1986                   | Dog           | ND                  | NA                                              | AF325484                                                         |                        |
| Hungary                | 1991                   | Human         | Cosmopolitan        | U43025                                          | AF325462                                                         |                        |
| India                  | 2006                   | Human         | Arctic-related      | EF437215                                        | EF437215                                                         |                        |
| India                  | ND                     | Dog           | Indian subcontinent | AF374721                                        |                                                                  |                        |
| Indonesia              | 2003                   | Dog           | Asian               | EU086192                                        | EU086151                                                         |                        |
| Iran                   | ND                     | Jackal        | Cosmopolitan        | KX148212;<br>JX987746                           | KX148212                                                         |                        |
| Iran                   | ND                     | Dog           | Cosmopolitan        | MK760760                                        | MK760760                                                         |                        |
| Iran                   | 1987                   | Wolf          | Cosmopolitan        | U22483                                          | NA                                                               |                        |
| Kazakhstan             | 1988                   | Red fox       | Cosmopolitan        | AY352489                                        | NA                                                               |                        |
| Laos                   | 1999                   | Dog           | Asian               | EU086193                                        | EU086152                                                         |                        |
| Morocco                | 1986                   | Dog           | ND                  | NA                                              | AF325467                                                         |                        |
| Myanmar                | 1999                   | Dog           | Asian               | EU086165                                        | EU086129                                                         |                        |

|              |      |             |                     |          |          |  |
|--------------|------|-------------|---------------------|----------|----------|--|
| Nepal        | 1998 | Dog         | Indian subcontinent | EU086196 | EU086153 |  |
| Nepal        | 2011 | Cattle      | Indian subcontinent | KX148108 | KX148108 |  |
| Philippines  | 2004 | Human       | Asian               | EU086205 | EU086155 |  |
| Poland       | 1985 | Raccoon dog | Cosmopolitan        | U22840   | AF325464 |  |
| Russia       | ND   | Dog         | Cosmopolitan        | JQ944706 | JQ944706 |  |
| Russia       | 1996 | Dog         | Cosmopolitan        | AY352481 | NA       |  |
| South Africa | 2013 | Mongoose    | Africa-3            | KX148220 | KX148220 |  |
| Tajikistan   | 2012 | Dog         | Cosmopolitan        | KY765901 | KY765901 |  |
| Thailand     | ND   | Dog         | Asian               | JN786877 | JN786877 |  |
| Turkey       | ND   | Dog         | Cosmopolitan        | KY860610 | KY860610 |  |
| USA          | 2005 | Bat         | Bat                 | JQ685902 | JQ685902 |  |
| Vietnam      | 2001 | Dog         | Asian               | EU086209 | EU086159 |  |
