# Supplementary material for: Genomic Surveillance of Rabies Virus in Georgian Canines
Source: Preprints.org preprint supplement (doi:10.20944/preprints202306.1828.v1), 2023-06-26
Supplement: Supplementary file 3 [file supplementary]

Archive with 2 entries (2 files):
- Supplementary Figures 1-4.pdf
- Supplementary_tables.pdf
